# Supplementary material for: Swimming Activity of Gilthead Seabream (Sparus aurata) in Swim-Tunnels: Accelerations, Oxygen Consumption and Body Motion
Source: Frontiers journal article supplement (doi:10.3389/fanim.2021.679848), 2021-07-09
Supplement: Image_1.pdf [file Image_1.pdf]

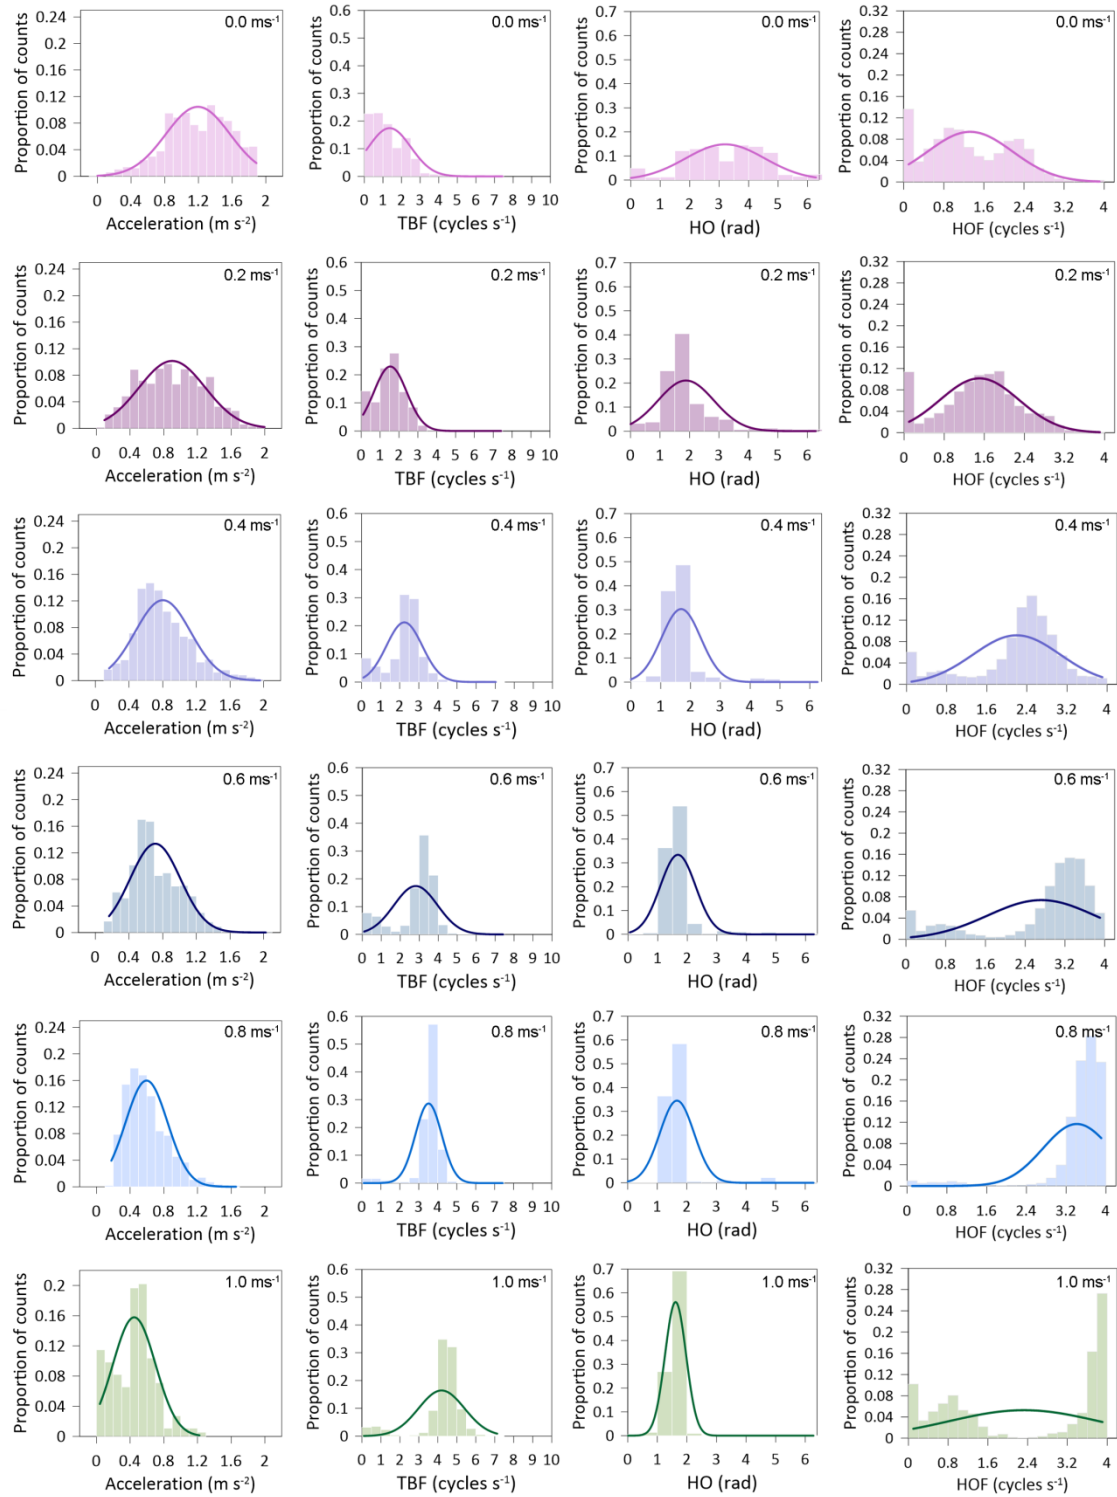

**Supplementary Figure S1:** Distribution of main estimated parameters on *Sparus aurata* during swim-tunnel trials at different swimming speeds. LEFT: accelerations and fitted Gaussian lines; CENTER-LEFT: tail beat frequency (TBF) observations and fitted Gaussian lines; CENTER-RIGHT: head orientation values (HO) and fitted Gaussian lines (Note that the exact swimming position against the current is in HO = 1.57 rad); RIGHT: head orientation frequency (HOF) and fitted Gaussian lines.
